# Supplementary material
Source: publisher figshare collection journal article supplement (https://sage.figshare.com/ndownloader/files/18737156)
Supplement: Supplementary file 1 [file 18737156]

## **Supplementary Text**

### **Methods**

This study was conducted in accordance with the CISS-RDC-668035 and 13-SSH-MCG-3749-S001 protocols approved by the Social Sciences and Humanities Research Council of Canada (SSHRC) and the Quebec Inter-University Centre for Social Statistics (QICSS), respectively. In addition, this project received an exemption from McGill University's Research Ethics Board Review.

Three different population-based cancer databases were leveraged to analyze data on the incidence and mortality rates associated with invasive penile SCC in Canada for the period of 1992 to 2010 (i.e., cases of erythroplasia of Queyrat were not included in this analysis).

Incidence data was collected from the Canadian Cancer Registry (CCR) and Le Registre Québécois du Cancer (LRQC) databases, as previously reported<sup>13-16</sup>. The CCR provides information on Canadian residents from all provinces and territories (excluding Quebec) who were diagnosed with a primary tumour between 1992 to 2013. Similarly, the LRQC provides information on Quebec residents diagnosed with a primary tumour from 1992 to 2010. The demographic information provided by these databases include the patient's sex, year of diagnosis, age at the time of diagnosis, forward sortation area (FSA; first 3 entries of a postal code), province of residence, as well as the ICD-O-3 code of the neoplasm. Given that the data from the LRQC was only available until 2010, we chose to analyze incidence rates from 1992 to 2010 in order to provide a consistent and holistic perspective across Canada. Mortality data was collected from the Canadian Vital Statistics (CVS) database, which provided demographic information on patients including sex, year of death, age at the time of death, FSA of residence, and the International Statistical Classification of Diseases and Related Health Problems (cause-

of-death) code for the malignancy. For the purpose of this study, we analysed mortality rates for the period ranging from 1992 to 2010.

Incidence data was collected from the CCR and LRQC by its primary site (topography) codes of penis (C60.0 for malignant neoplasm of the prepuce, C60.1 for malignant neoplasm of the glans, C60.2 for malignant neoplasm of the body of penis, C60.8 for malignant neoplasm with overlapping lesion of penis, and C60.9 for malignant neoplasm of the penis NOS) and by using the International Classification of Diseases for Oncology ICD-O-3 codes for all penile SCC subtypes. The following ICD-O-3 codes and penile cancer sub-types were included in the analysis: 8051 Verrucous carcinoma, 8070 SCC, 8074 spindle cell SCC. SCCs in situ were not included in this study since the databases only provided information on invasive neoplasms. Mortality due to penile cancer was assessed using the International Statistical Classification of Diseases and Related Health Problems, ninth revision (ICD-9) for deaths between the years 1992 and 1999, and the corresponding tenth revision (ICD-10) for deaths between the years 2000 and 2010. Incidence and mortality rates were calculated using population counts nationally, per province, and per forward sortation area (FSA). These were obtained from the Canadian Census of Population for 1996, 2001, 2006 and 2011 from Statistics Canada. Only FSAs that had a male population count  $\geq 5000$  were included in the analysis to eliminate areas with artificially inflated incidence and mortality rates.

Linear regression models were used to establish correlations between provincial incidence rates of penile SCC and selected risk factors such as cigarette smoking, obesity, Caucasian ethnicity, and median income, used to represent socioeconomic status (SES). In addition, risk factors were compared between FSAs with statistically significantly higher

incidence rates than the national average and FSAs with zero cases of penile SCC by using the Student's t-test. Differences were considered significant when  $p < 0.05$ .

#### Mandatory data rounding

Prior to publication, data obtained from the CCR, LRQC and CVS must respect a number of confidentiality rules. As such, the SSHRC and Statistics Canada require researchers to round each frequency count to a lower or higher multiple of 5 using a random rounding scheme. In addition, frequency counts that are  $\geq 1$  and  $\leq 5$  cannot be released as per the SSHRC rules to protect patient confidentiality.

#### Data Analysis

Both crude and age-adjusted incidence rates and their associated 95 % confidence intervals (95% CI) were calculated. They were reported overall, by the year of diagnosis, by province, and by FSA. 95% CIs were calculated based on exact Poisson distributions and adjusted for rare effects. Age-adjusted incidence and mortality rates were calculated using indirect method with the 2001 Canadian Census population as a standard.

## **Supplementary Tables**

**Supplementary Table 1.** Penile squamous cell carcinoma incidence rates by age group for the years 1992 to 2010. Incidence rates are presented per million men per year.

| <b>Age Group</b> | <b>Cases †</b> | <b>Male Population<br/>(rounded to 1,000)</b> | <b>Incidence per<br/>million men (95%<br/>CI)</b> |
|------------------|----------------|-----------------------------------------------|---------------------------------------------------|
| 0-19             | 0              | 4,061,810                                     | 0.00 (0.00-0.01)                                  |
| 20-39            | 55             | 4,630,745                                     | 0.63 (0.47-0.63)                                  |
| 40-59            | 455            | 4,303,970                                     | 5.56 (5.06-5.58)                                  |
| 60-79            | 955            | 2,063,720                                     | 24.36 (22.84-24.41)                               |
| 80+              | 295            | 323,510                                       | 47.99 (42.67-48.27)                               |

† Number of cases was rounded to a multiple of 5 as per SSHRC/Statistics Canada regulations.

**Supplementary Table 2.** Overall penile squamous cell carcinoma crude and age-adjusted incidence rates by province between 1992 and 2010. Incidence rates are presented per million men per year. ‡ Frequency counts that were <5 and could not be released as per SSHRC/Statistics Canada regulations to protect patients' confidentiality.

| <b>Provinces/ Territories</b> | <b>Cases</b> | <b>Male Population (rounded to 1,000)</b> | <b>Crude Incidence per Million (95% CI)</b> | <b>Age-adjusted Incidence per Million (95% CI)</b> |
|-------------------------------|--------------|-------------------------------------------|---------------------------------------------|----------------------------------------------------|
| New Brunswick                 | 85           | 370,000                                   | 12.09 (9.66-14.95)                          | 10.94 (8.61-11.58)                                 |
| Nova Scotia                   | 95           | 457,000                                   | 10.94 (8.85-13.37)                          | 9.82 (7.81-9.93)                                   |
| Newfoundland and Labrador     | 50           | 265,000                                   | 9.93 (7.37-13.09)                           | 9.31 (6.86-9.49)                                   |
| Saskatchewan                  | 90           | 502,000                                   | 9.44 (7.59-11.60)                           | 8.67 (6.88-8.76)                                   |
| Manitoba                      | 75           | 575,000                                   | 6.86 (5.40-8.61)                            | 6.61 (5.16-6.69)                                   |
| British Columbia              | 230          | 2,007,000                                 | 6.03 (5.28-6.86)                            | 5.35 (4.64-5.38)                                   |
| Alberta                       | 175          | 1,573,000                                 | 5.86 (5.02-6.79)                            | 6.49 (5.61-6.53)                                   |
| Quebec                        | 390          | 3,676,000                                 | 5.58 (5.04-6.17)                            | 5.18 (4.65-5.19)                                   |
| Ontario                       | 560          | 5,853,000                                 | 5.04 (4.63-5.47)                            | 4.84 (4.44-4.85)                                   |
| Prince Edward Island          | 5            | 67,000                                    | 3.93 (1.28-9.17)                            | 3.50 (1.42-4.77)                                   |
| Nunavut                       | ‡            | -                                         | -                                           | -                                                  |
| Northwest Territories         | ‡            | -                                         | -                                           | -                                                  |
| Yukon                         | ‡            | -                                         | -                                           | -                                                  |

† Number of cases was rounded to a multiple of 5 as per SSHRC/Statistics Canada regulations.

**Supplementary Table 3.** Penile squamous cell carcinoma combined incidence rates between 1992 and 2010 for high-incidence FSAs and low-incidence FSAs. FSAs were analyzed in groups due to the rarity of the malignancy. Incidence rates are presented per million men per year.

| Group                      | FSAs                                                                                                                                                                                                                                                                                                                                                                                                                                                                                                                                                                                                                                                                                                                                                                                                                                                                                                                                                                                                                                                                                                                                                                                                                                                                                                                                                                   | Cases<br>† | Male<br>population<br>(rounded<br>to 1,000) | Incidence<br>(95% CI)   |
|----------------------------|------------------------------------------------------------------------------------------------------------------------------------------------------------------------------------------------------------------------------------------------------------------------------------------------------------------------------------------------------------------------------------------------------------------------------------------------------------------------------------------------------------------------------------------------------------------------------------------------------------------------------------------------------------------------------------------------------------------------------------------------------------------------------------------------------------------------------------------------------------------------------------------------------------------------------------------------------------------------------------------------------------------------------------------------------------------------------------------------------------------------------------------------------------------------------------------------------------------------------------------------------------------------------------------------------------------------------------------------------------------------|------------|---------------------------------------------|-------------------------|
| High-<br>incidence<br>FSAs | B0K, B0S, B2N, B5A, E2A, K6V, R0J, R2W, R7A, S0A, S0G, V0N, V0K                                                                                                                                                                                                                                                                                                                                                                                                                                                                                                                                                                                                                                                                                                                                                                                                                                                                                                                                                                                                                                                                                                                                                                                                                                                                                                        | 85         | 210,000                                     | 21.30<br>(17.016-26.34) |
| Low-<br>incidence<br>FSAs  | A1B, A1G, A1M, A1N, A1S, A1V, A1W, A1X, A2V, A5A, B0C, B0V, B1S, B1Y, B2G, B2S, B2T, B2X, B2Z, B3E, B3G, B3J, B3R, B3S, B3Z, B4A, B4B, B4E, B4N, B4P, B6L, C1B, C1E, E0E, E0G, E0K, E0L, E1A, E1H, E1W, E3C, E3G, E3L, E3N, E3V, E3Y, E4E, E4R, E4S, E4W, E5K, E5N, E7L, E8E, E8J, E8T, E9G, G0B, G0P, G1B, G1S, G1T, G1V, G1W, G1Y, G2C, G2E, G2G, G2K, G2N, G3A, G3B, G3C, G3E, G3G, G3H, G3J, G3K, G3L, G3M, G3N, G3Z, G4S, G4T, G4V, G4Z, G5A, G5B, G5H, G5J, G5N, G5X, G5Y, G6C, G6E, G6J, G6X, G6Z, G7A, G7G, G7J, G7N, G7S, G8A, G8H, G8K, G8L, G8V, G9B, G9H, G9P, G9X, H1C, H1X, H1, H2B, H2E, H2H, H2M, H2N, H2W, H3E, H3G, H3J, H3M, H3P, H3R, H3T, H3V, H3Y, H3Z, H4B, H4J, H4N, H4R, H4W, H4X, H7A, H7C, H7G, H7H, H7K, H7L, H7M, H7Y, H8R, H8T, H9B, H9H, H9J, H9K, J0W, J0Y, J1A, J1E, J1K, J1M, J1R, J1T, J2A, J2H, J2J, J2K, J2L, J2M, J2R, J2T, J2W, J3E, J3G, J3L, J3M, J3T, J3X, J4G, J4M, J4R, J4S, J4V, J4X, J4Y, J5A, J5B, J5C, J5J, J5K, J5L, J5M, J5T, J5V, J5W, J5X, J6J, J6K, J6R, J6T, J6V, J6W, J6Y, J6Z, J7B, J7C, J7E, J7H, J7J, J7L, J7N, J7P, J7R, J8A, J8B, J8G, J8H, J8M, J8N, J8R, J8V, J8Z, J9B, J9H, J9P, J9T, K0B, K1B, K1H, K1L, K1M, K1S, K1Z, K2B, K2C, K2E, K2G, K2K, K2L, K2P, K4A, K4K, K4M, K4R, K6A, K7A, K7C, K7G, K7L, K8H, K8P, K8V, K9H, K9L, L0A, L0B, L0K, L1B, L1M, L1N, L1P, L1V, L1W, L1X, L1Z, L2E, L2H, L2J, | 0          | 4,334,000                                   | -                       |

---

L2R, L2S, L2T, L3K, L3T, L3X, L4B, L4E,  
 L4S, L4W, L4Z, L5C, L5K, L5N, L5W, L6C,  
 L6E, L6H, L6Z, L7A, L7C, L7E, L7G, L7J,  
 L7K, L7M, L7S, L8G, L8J, L8N, L8W, L9L,  
 L9M, L9N, L9W, L9Y, L9Z, M1C, M1E, M1X,  
 M2K, M2P, M3A, M3B, M3C, M3H, M3J,  
 M3L, M3M, M4E, M4H, M4P, M4V, M4Y,  
 M5A, M5J, M5P, M5R, M5S, M5V, M6B, M8X,  
 M8Z, M9M, N0C, N0P, N1K, N1L, N1M, N1S,  
 N2A, N2C, N2G, N2H, N2N, N2P, N2T, N2V,  
 N2Z, N3A, N3W, N4B, N4L, N4X, N5C, N5V,  
 N5W, N6B, N6C, N6E, N6J, N6P, N8A, N8M,  
 N8N, N8P, N8R, N8S, N8T, N8X, N8Y, N9B,  
 N9J, N9V, P0B, P0L, P0N, P0R, P0S, P0X, P1H,  
 P1L, P2A, P2B, P3A, P3L, P3N, P5A, P6B, P6C,  
 P7C, P7G, P8N, P9A, P9N, R0E, R2E, R2G,  
 R2J, R2L, R2P, R2X, R3L, R3M, R3N, R3V,  
 R3X, R3Y, R5H, R6W, R7B, R8A, R8N, R9A,  
 S0N, S0P, S4P, S4V, S4X, S7H, S7J, S9A, S9V,  
 T1G, T1J, T1L, T1M, T1P, T1W, T1Y, T2C,  
 T2H, T2L, T2P, T2T, T2V, T3G, T3M, T3R,  
 T3Z, T4A, T4J, T4R, T4S, T4T, T4X, T5K, T5L,  
 T5N, T5T, T5X, T5Y, T6E, T6M, T6T, T6V,  
 T6W, T6X, T7E, T7N, T7P, T7V, T7X, T7Y,  
 T8B, T8E, T8H, T8R, T8S, T8T, T8V, T8W,  
 T9E, T9G, T9K, T9M, T9S, T9X, V0A, V0J,  
 V0M, V0S, V1B, V1C, V1E, V1L, V1M, V1P,  
 V1S, V1V, V1W, V1Z, V2B, V2G, V2W, V3B,  
 V3C, V3E, V3G, V3T, V4E, V4K, V4M, V4R,  
 V4W, V4X, V5A, V5E, V5G, V5J, V5N, V5R,  
 V5T, V5V, V5Z, V6E, V6G, V6H, V6N, V6R,  
 V6S, V6T, V6V, V6Y, V6Z, V7A, V7E, V7G,  
 V7K, V7P, V7S, V7V, V7W, V8A, V8B, V8C,  
 V8J, V8V, V8Y, V9B, V9C, V9J, V9K, V9P,  
 V9S, V9X, V9Z, X0C, X0E, X1A, Y0B

---

† Number of cases was rounded to a multiple of 5 as per SSHRC/Statistics Canada regulations.

**Supplementary Table 4.** Average median income for FSAs with a penile SCC incidence rate that is higher than the national average, as well as FSAs with lower incidence rates than the national average. Means were considered statistically significantly different if  $p < 0.05$ .

| Group               | FSAs                                                                                                                                                                                                                                                                                                                                                                                                                                                                                                                                                                                                                                                                                                                                                                                                                                                                                                                                                                                                                                                                                                                                                                                                                                                                                                                                                                                                                                                                                                                                                                                                                                                                                                                                                                              | Average median income, \$ | p-value |
|---------------------|-----------------------------------------------------------------------------------------------------------------------------------------------------------------------------------------------------------------------------------------------------------------------------------------------------------------------------------------------------------------------------------------------------------------------------------------------------------------------------------------------------------------------------------------------------------------------------------------------------------------------------------------------------------------------------------------------------------------------------------------------------------------------------------------------------------------------------------------------------------------------------------------------------------------------------------------------------------------------------------------------------------------------------------------------------------------------------------------------------------------------------------------------------------------------------------------------------------------------------------------------------------------------------------------------------------------------------------------------------------------------------------------------------------------------------------------------------------------------------------------------------------------------------------------------------------------------------------------------------------------------------------------------------------------------------------------------------------------------------------------------------------------------------------|---------------------------|---------|
| High-incidence FSAs | B0K, B0S, B2N, B5A, E2A, K6V, R0J, R2W, R7A, S0A, S0G, V0N, V0K                                                                                                                                                                                                                                                                                                                                                                                                                                                                                                                                                                                                                                                                                                                                                                                                                                                                                                                                                                                                                                                                                                                                                                                                                                                                                                                                                                                                                                                                                                                                                                                                                                                                                                                   | 18,650                    | <0.001  |
| Low-incidence FSAs  | A1B, A1G, A1M, A1N, A1S, A1V, A1W, A1X, A2V, A5A, B0C, B0V, B1S, B1Y, B2G, B2S, B2T, B2X, B2Z, B3E, B3G, B3J, B3R, B3S, B3Z, B4A, B4B, B4E, B4N, B4P, B6L, C1B, C1E, E0E, E0G, E0K, E0L, E1A, E1H, E1W, E3C, E3G, E3L, E3N, E3V, E3Y, E4E, E4R, E4S, E4W, E5K, E5N, E7L, E8E, E8J, E8T, E9G, G0B, G0P, G1B, G1S, G1T, G1V, G1W, G1Y, G2C, G2E, G2G, G2K, G2N, G3A, G3B, G3C, G3E, G3G, G3H, G3J, G3K, G3L, G3M, G3N, G3Z, G4S, G4T, G4V, G4Z, G5A, G5B, G5H, G5J, G5N, G5X, G5Y, G6C, G6E, G6J, G6X, G6Z, G7A, G7G, G7J, G7N, G7S, G8A, G8H, G8K, G8L, G8V, G9B, G9H, G9P, G9X, H1C, H1X, H1, H2B, H2E, H2H, H2M, H2N, H2W, H3E, H3G, H3J, H3M, H3P, H3R, H3T, H3V, H3Y, H3Z, H4B, H4J, H4N, H4R, H4W, H4X, H7A, H7C, H7G, H7H, H7K, H7L, H7M, H7Y, H8R, H8T, H9B, H9H, H9J, H9K, J0W, J0Y, J1A, J1E, J1K, J1M, J1R, J1T, J2A, J2H, J2J, J2K, J2L, J2M, J2R, J2T, J2W, J3E, J3G, J3L, J3M, J3T, J3X, J4G, J4M, J4R, J4S, J4V, J4X, J4Y, J5A, J5B, J5C, J5J, J5K, J5L, J5M, J5T, J5V, J5W, J5X, J6J, J6K, J6R, J6T, J6V, J6W, J6Y, J6Z, J7B, J7C, J7E, J7H, J7J, J7L, J7N, J7P, J7R, J8A, J8B, J8G, J8H, J8M, J8N, J8R, J8V, J8Z, J9B, J9H, J9P, J9T, K0B, K1B, K1H, K1L, K1M, K1S, K1Z, K2B, K2C, K2E, K2G, K2K, K2L, K2P, K4A, K4K, K4M, K4R, K6A, K7A, K7C, K7G, K7L, K8H, K8P, K8V, K9H, K9L, L0A, L0B, L0K, L1B, L1M, L1N, L1P, L1V, L1W, L1X, L1Z, L2E, L2H, L2J, L2R, L2S, L2T, L3K, L3T, L3X, L4B, L4E, L4S, L4W, L4Z, L5C, L5K, L5N, L5W, L6C, L6E, L6H, L6Z, L7A, L7C, L7E, L7G, L7J, L7K, L7M, L7S, L8G, L8J, L8N, L8W, L9L, L9M, L9N, L9W, L9Y, L9Z, M1C, M1E, M1X, M2K, M2P, M3A, M3B, M3C, M3H, M3J, M3L, M3M, M4E, M4H, M4P, M4V, M4Y, M5A, M5J, M5P, M5R, M5S, M5V, M6B, M8X, M8Z, M9M, N0C, N0P, N1K, N1L, N1M, N1S, N2A, N2C, N2G, N2H, N2N, N2P, N2T, N2V, N2Z, | 25,010                    |         |



---

N3A, N3W, N4B, N4L, N4X, N5C, N5V, N5W, N6B, N6C,  
N6E, N6J, N6P, N8A, N8M, N8N, N8P, N8R, N8S, N8T, N8X,  
N8Y, N9B, N9J, N9V, P0B, P0L, P0N, P0R, P0S, P0X, P1H,  
P1L, P2A, P2B, P3A, P3L, P3N, P5A, P6B, P6C, P7C, P7G,  
P8N, P9A, P9N, R0E, R2E, R2G, R2J, R2L, R2P, R2X, R3L,  
R3M, R3N, R3V, R3X, R3Y, R5H, R6W, R7B, R8A, R8N,  
R9A, S0N, S0P, S4P, S4V, S4X, S7H, S7J, S9A, S9V, T1G,  
T1J, T1L, T1M, T1P, T1W, T1Y, T2C, T2H, T2L, T2P, T2T,  
T2V, T3G, T3M, T3R, T3Z, T4A, T4J, T4R, T4S, T4T, T4X,  
T5K, T5L, T5N, T5T, T5X, T5Y, T6E, T6M, T6T, T6V, T6W,  
T6X, T7E, T7N, T7P, T7V, T7X, T7Y, T8B, T8E, T8H, T8R,  
T8S, T8T, T8V, T8W, T9E, T9G, T9K, T9M, T9S, T9X, V0A,  
V0J, V0M, V0S, V1B, V1C, V1E, V1L, V1M, V1P, V1S,  
V1V, V1W, V1Z, V2B, V2G, V2W, V3B, V3C, V3E, V3G,  
V3T, V4E, V4K, V4M, V4R, V4W, V4X, V5A, V5E, V5G,  
V5J, V5N, V5R, V5T, V5V, V5Z, V6E, V6G, V6H, V6N,  
V6R, V6S, V6T, V6V, V6Y, V6Z, V7A, V7E, V7G, V7K,  
V7P, V7S, V7V, V7W, V8A, V8B, V8C, V8J, V8V, V8Y,  
V9B, V9C, V9J, V9K, V9P, V9S, V9X, V9Z, X0C, X0E, X1A,  
Y0B

---

**Supplementary Table 5.** Average percentage of Caucasian individuals in FSAs with a penile SCC incidence rates that are higher than the national average, as well as FSAs with lower incidence rates than the national average. Means were considered statistically significantly different if  $p < 0.05$ .

| Group               | FSAs                                                                                                                                                                                                                                                                                                                                                                                                                                                                                                                                                                                                                                                                                                                                                                                                                                                                                                                                                                                                                                                                                                                                                                                                                                                                                                                                                                                                                                                                                           | Percentage of the population that is Caucasian, % | p-value |
|---------------------|------------------------------------------------------------------------------------------------------------------------------------------------------------------------------------------------------------------------------------------------------------------------------------------------------------------------------------------------------------------------------------------------------------------------------------------------------------------------------------------------------------------------------------------------------------------------------------------------------------------------------------------------------------------------------------------------------------------------------------------------------------------------------------------------------------------------------------------------------------------------------------------------------------------------------------------------------------------------------------------------------------------------------------------------------------------------------------------------------------------------------------------------------------------------------------------------------------------------------------------------------------------------------------------------------------------------------------------------------------------------------------------------------------------------------------------------------------------------------------------------|---------------------------------------------------|---------|
| High-incidence FSAs | B0K, B0S, B2N, B5A, E2A, K6V, R0J, R2W, R7A, S0A, S0G, V0N, V0K                                                                                                                                                                                                                                                                                                                                                                                                                                                                                                                                                                                                                                                                                                                                                                                                                                                                                                                                                                                                                                                                                                                                                                                                                                                                                                                                                                                                                                | 94.34                                             | <0.001  |
| Low-incidence FSAs  | A1B, A1G, A1M, A1N, A1S, A1V, A1W, A1X, A2V, A5A, B0C, B0V, B1S, B1Y, B2G, B2S, B2T, B2X, B2Z, B3E, B3G, B3J, B3R, B3S, B3Z, B4A, B4B, B4E, B4N, B4P, B6L, C1B, C1E, E0E, E0G, E0K, E0L, E1A, E1H, E1W, E3C, E3G, E3L, E3N, E3V, E3Y, E4E, E4R, E4S, E4W, E5K, E5N, E7L, E8E, E8J, E8T, E9G, G0B, G0P, G1B, G1S, G1T, G1V, G1W, G1Y, G2C, G2E, G2G, G2K, G2N, G3A, G3B, G3C, G3E, G3G, G3H, G3J, G3K, G3L, G3M, G3N, G3Z, G4S, G4T, G4V, G4Z, G5A, G5B, G5H, G5J, G5N, G5X, G5Y, G6C, G6E, G6J, G6X, G6Z, G7A, G7G, G7J, G7N, G7S, G8A, G8H, G8K, G8L, G8V, G9B, G9H, G9P, G9X, H1C, H1X, H1, H2B, H2E, H2H, H2M, H2N, H2W, H3E, H3G, H3J, H3M, H3P, H3R, H3T, H3V, H3Y, H3Z, H4B, H4J, H4N, H4R, H4W, H4X, H7A, H7C, H7G, H7H, H7K, H7L, H7M, H7Y, H8R, H8T, H9B, H9H, H9J, H9K, J0W, J0Y, J1A, J1E, J1K, J1M, J1R, J1T, J2A, J2H, J2J, J2K, J2L, J2M, J2R, J2T, J2W, J3E, J3G, J3L, J3M, J3T, J3X, J4G, J4M, J4R, J4S, J4V, J4X, J4Y, J5A, J5B, J5C, J5J, J5K, J5L, J5M, J5T, J5V, J5W, J5X, J6J, J6K, J6R, J6T, J6V, J6W, J6Y, J6Z, J7B, J7C, J7E, J7H, J7J, J7L, J7N, J7P, J7R, J8A, J8B, J8G, J8H, J8M, J8N, J8R, J8V, J8Z, J9B, J9H, J9P, J9T, K0B, K1B, K1H, K1L, K1M, K1S, K1Z, K2B, K2C, K2E, K2G, K2K, K2L, K2P, K4A, K4K, K4M, K4R, K6A, K7A, K7C, K7G, K7L, K8H, K8P, K8V, K9H, K9L, L0A, L0B, L0K, L1B, L1M, L1N, L1P, L1V, L1W, L1X, L1Z, L2E, L2H, L2J, L2R, L2S, L2T, L3K, L3T, L3X, L4B, L4E, L4S, L4W, L4Z, L5C, L5K, L5N, L5W, L6C, L6E, L6H, L6Z, L7A, L7C, L7E, L7G, L7J, | 85.63                                             |         |

---

L7K, L7M, L7S, L8G, L8J, L8N, L8W, L9L, L9M, L9N,  
L9W, L9Y, L9Z, M1C, M1E, M1X, M2K, M2P, M3A,  
M3B, M3C, M3H, M3J, M3L, M3M, M4E, M4H, M4P,  
M4V, M4Y, M5A, M5J, M5P, M5R, M5S, M5V, M6B,  
M8X, M8Z, M9M, N0C, N0P, N1K, N1L, N1M, N1S, N2A,  
N2C, N2G, N2H, N2N, N2P, N2T, N2V, N2Z, N3A, N3W,  
N4B, N4L, N4X, N5C, N5V, N5W, N6B, N6C, N6E, N6J,  
N6P, N8A, N8M, N8N, N8P, N8R, N8S, N8T, N8X, N8Y,  
N9B, N9J, N9V, P0B, P0L, P0N, P0R, P0S, P0X, P1H, P1L,  
P2A, P2B, P3A, P3L, P3N, P5A, P6B, P6C, P7C, P7G, P8N,  
P9A, P9N, R0E, R2E, R2G, R2J, R2L, R2P, R2X, R3L,  
R3M, R3N, R3V, R3X, R3Y, R5H, R6W, R7B, R8A, R8N,  
R9A, S0N, S0P, S4P, S4V, S4X, S7H, S7J, S9A, S9V, T1G,  
T1J, T1L, T1M, T1P, T1W, T1Y, T2C, T2H, T2L, T2P,  
T2T, T2V, T3G, T3M, T3R, T3Z, T4A, T4J, T4R, T4S,  
T4T, T4X, T5K, T5L, T5N, T5T, T5X, T5Y, T6E, T6M,  
T6T, T6V, T6W, T6X, T7E, T7N, T7P, T7V, T7X, T7Y,  
T8B, T8E, T8H, T8R, T8S, T8T, T8V, T8W, T9E, T9G,  
T9K, T9M, T9S, T9X, V0A, V0J, V0M, V0S, V1B, V1C,  
V1E, V1L, V1M, V1P, V1S, V1V, V1W, V1Z, V2B, V2G,  
V2W, V3B, V3C, V3E, V3G, V3T, V4E, V4K, V4M, V4R,  
V4W, V4X, V5A, V5E, V5G, V5J, V5N, V5R, V5T, V5V,  
V5Z, V6E, V6G, V6H, V6N, V6R, V6S, V6T, V6V, V6Y,  
V6Z, V7A, V7E, V7G, V7K, V7P, V7S, V7V, V7W, V8A,  
V8B, V8C, V8J, V8V, V8Y, V9B, V9C, V9J, V9K, V9P,  
V9S, V9X, V9Z, X0C, X0E, X1A, Y0B

---

**Supplementary Table 6.** Overall penile carcinoma crude and age-adjusted mortality rates by province between 1992 and 2010. Mortality rates are presented per million men per year. ‡Death counts that were <5 and could not be released as per SSHRC/Statistics Canada regulations to protect patients' confidentiality.

| Province Name             | Deaths† | Male Population<br>(rounded to<br>1,000) | Crude Incidence<br>per Million (95%<br>CI) | Age-adjusted<br>Incidence per<br>Million (95% CI) |
|---------------------------|---------|------------------------------------------|--------------------------------------------|---------------------------------------------------|
| Saskatchewan              | 35      | 502,000                                  | 3.67 (2.56-5.10)                           | 3.28(2.22-3.36)                                   |
| Nova Scotia               | 25      | 457,000                                  | 2.88 (1.86-4.25)                           | 2.56(1.59-2.64)                                   |
| New Brunswick             | 20      | 370,000                                  | 2.84 (1.74-4.39)                           | 2.55(1.50-2.66)                                   |
| Newfoundland and Labrador | 10      | 265,000                                  | 1.99 (0.95-3.65)                           | 1.86(0.85-2.01)                                   |
| Manitoba                  | 20      | 575,000                                  | 1.83 (1.12-2.83)                           | 1.73(1.23-1.80)                                   |
| Quebec                    | 125     | 3,676,000                                | 1.79 (1.49-2.13)                           | 1.66(1.37-1.67)                                   |
| Ontario                   | 195     | 5,853,000                                | 1.75 (1.52-2.02)                           | 1.67(1.44-1.68)                                   |
| Alberta                   | 50      | 1,573,000                                | 1.67 (1.24-2.21)                           | 1.87(1.41-1.89)                                   |
| British Columbia          | 55      | 2,007,000                                | 1.44 (1.09-1.88)                           | 1.14(0.83-1.17)                                   |
| Prince Edward Island      | ‡       | -                                        | -                                          | -                                                 |
| Yukon                     | ‡       | -                                        | -                                          | -                                                 |
| Northwest Territories     | ‡       | -                                        | -                                          | -                                                 |
| Nunavut                   | ‡       | -                                        | -                                          | -                                                 |

† Number of cases was rounded to a multiple of 5 as per SSHRC/Statistics Canada regulations.
